# Supplementary material for: Extracellular Vesicles as Mediators of Nickel-Induced Cancer Progression
Source: MDPI journal article supplement (doi:10.3390/ijms232416111), 2022-12-17
Supplement: s1 [file s1]

## Supplementary figures

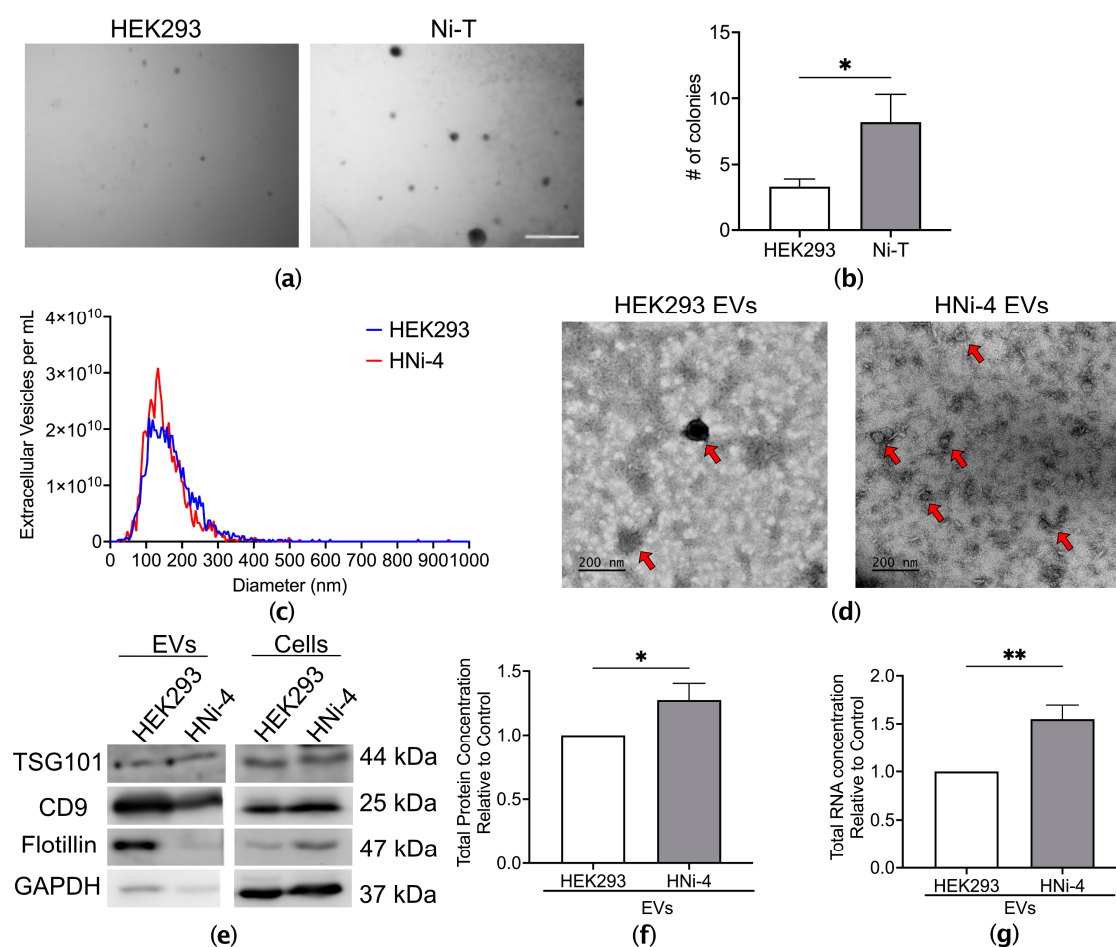

**Figure S1.** Characterization of EVs from Ni-transformed HEK293 cells. HEK293 cells were treated with 100  $\mu$ M NiCl<sub>2</sub> for 4 weeks, and seeded in soft agar (a-b). EVs from HEK293 and #4 Ni-transformed HEK293 cells (HNi-4) by UC and were characterized by several methodologies including (c) nanoparticle tracking analysis (NTA). (d) transmission electronic microscopy (TEM) and (e) immunoblot of EV markers CD9, flotillin, and TSG 101. Red arrow: extracellular vesicles. Comparison of total protein (f) and total RNA (g) of EVs from HEK293 and HNi-4. Values are presented as mean  $\pm$  SEM. \* $p$  < 0.05, \*\* $p$  < 0.01.

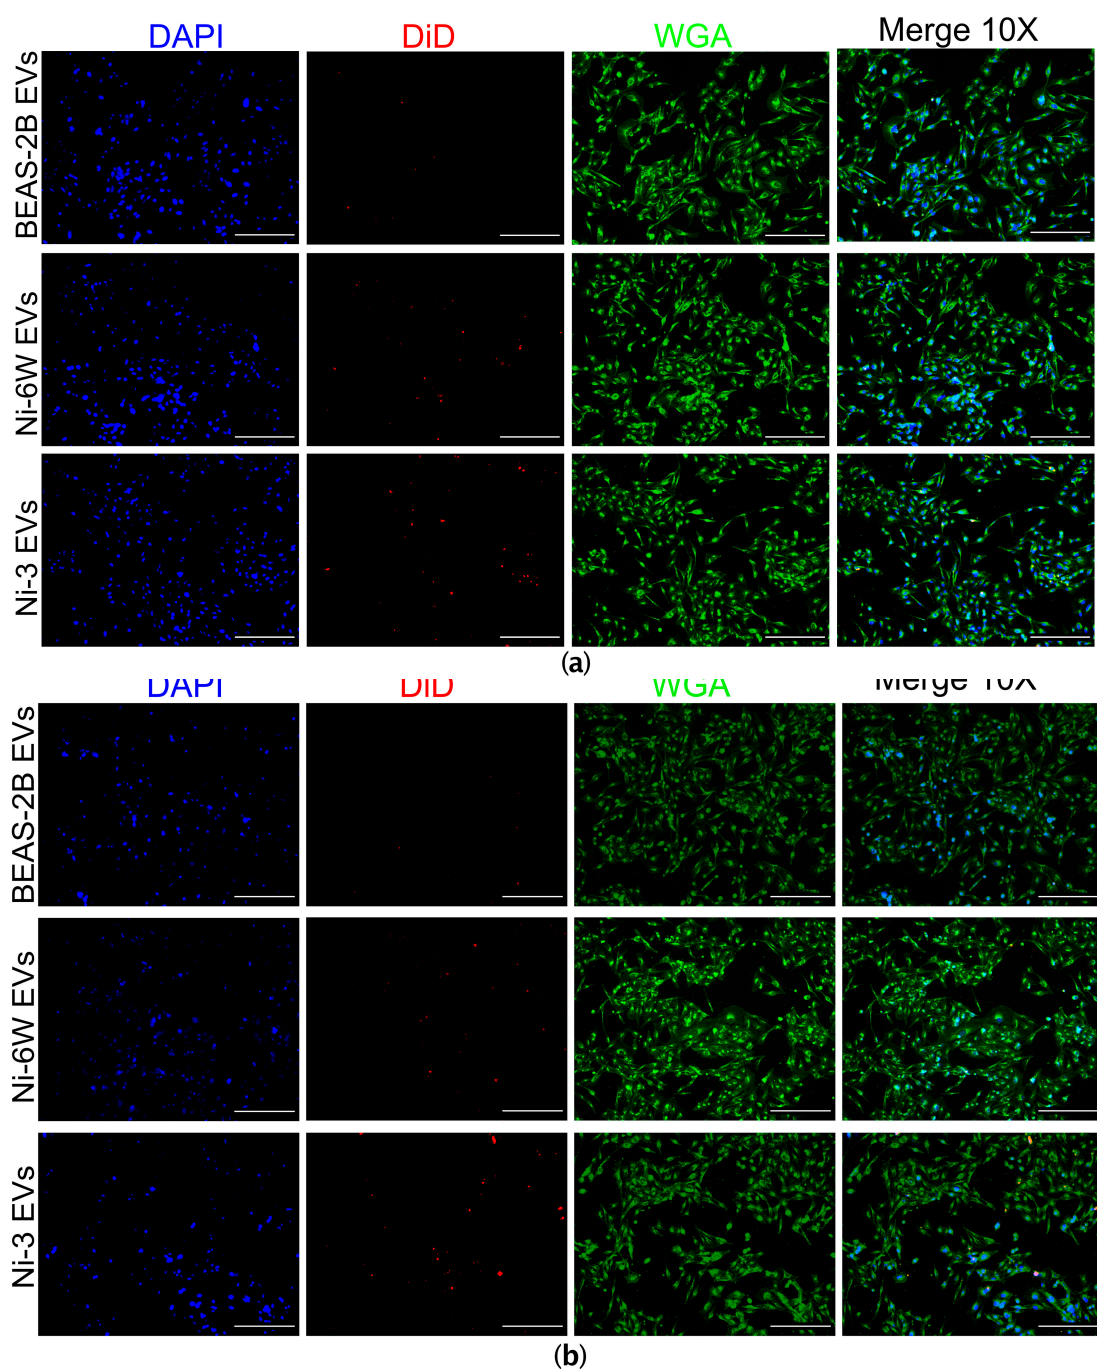

**Figure S2.** Uptake of EVs was affected by Ni exposure in BEAS-2B cells at 5 h. (a) EVs from Ni-6W, Ni-3 and BEAS-2B were isolated, labelled with DiD dye, and added to BEAS-2B cells for 5 h before being scanned with a Zoe fluorescence microscope (10X, scale bar: 400  $\mu$ m). (b) BEAS-2B cells were pretreated with 100  $\mu$ M Ni for 24 h before performing 5 h-EV-incorporation assay. Blue-DAPI, red-DiD, green-WGA, red arrow-incorporated EVs.

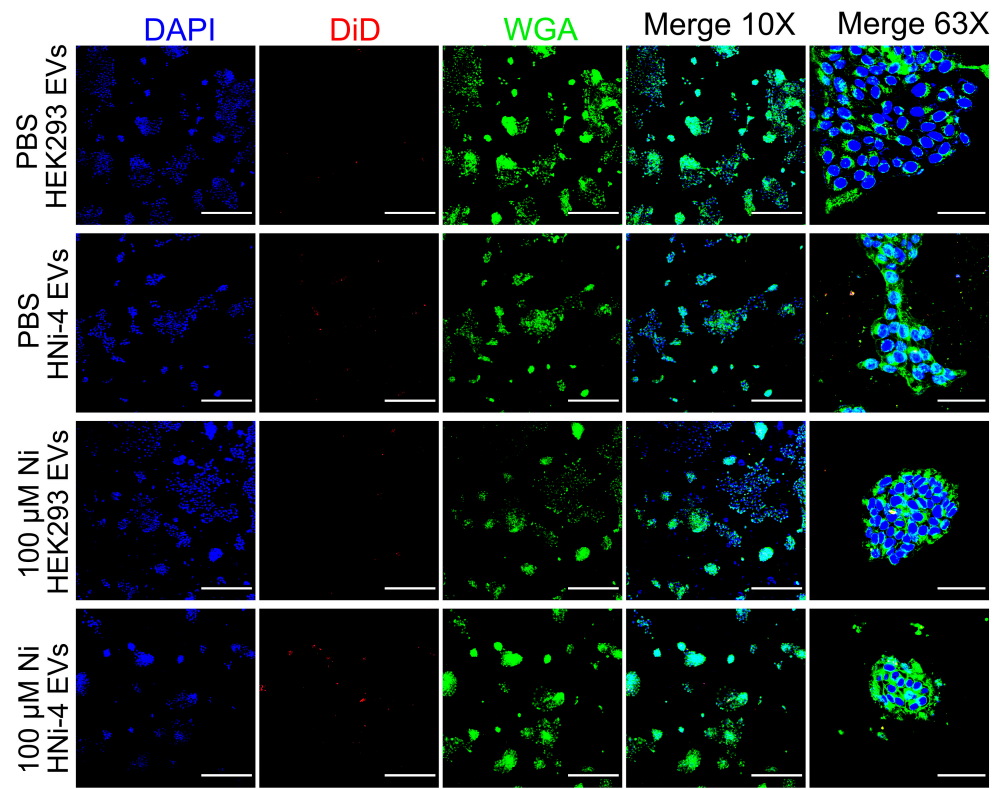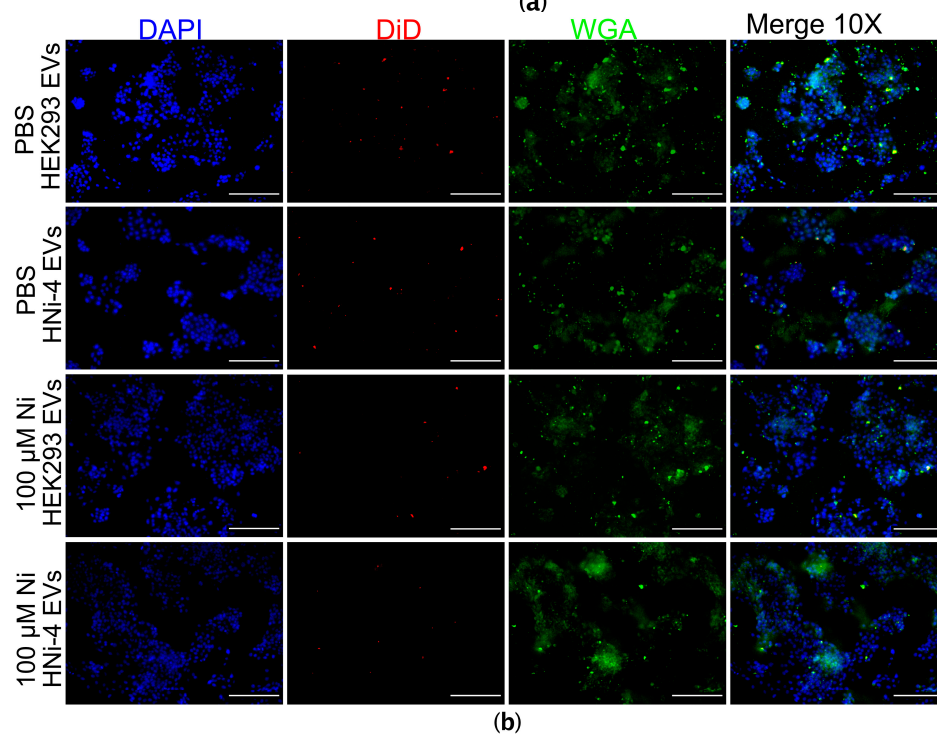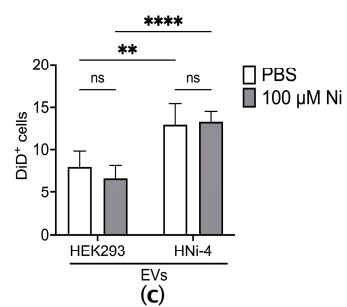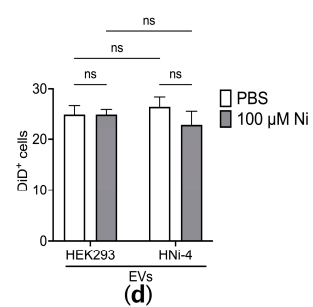

**Figure S3.** Uptake of EVs was affected by Ni exposure in HEK293 cells. (a) HEK293 cells were pretreated with

PBS or 100  $\mu$ M Ni for 24 h before adding HNi-4 EVs or HEK293 EVs for treating 1 h. **(b)** HEK293 cells were pretreated with PBS or 100  $\mu$ M Ni for 24 h before adding HNi-4 EVs or HEK293 EVs for treating 3 h. Blue-DAPI, red-DiD, green-WGA, red arrow-incorporated EVs. **(c)** and **(d)** Quantification and comparisons of the number of DiD-positive cells in **(a)** and **(b)**, respectively. Scale bar: 400  $\mu$ m (10X) and 60  $\mu$ m (63X). Values are presented as mean  $\pm$  SEM. \*\* $p$  < 0.01, \*\*\*\* $p$  < 0.0001.

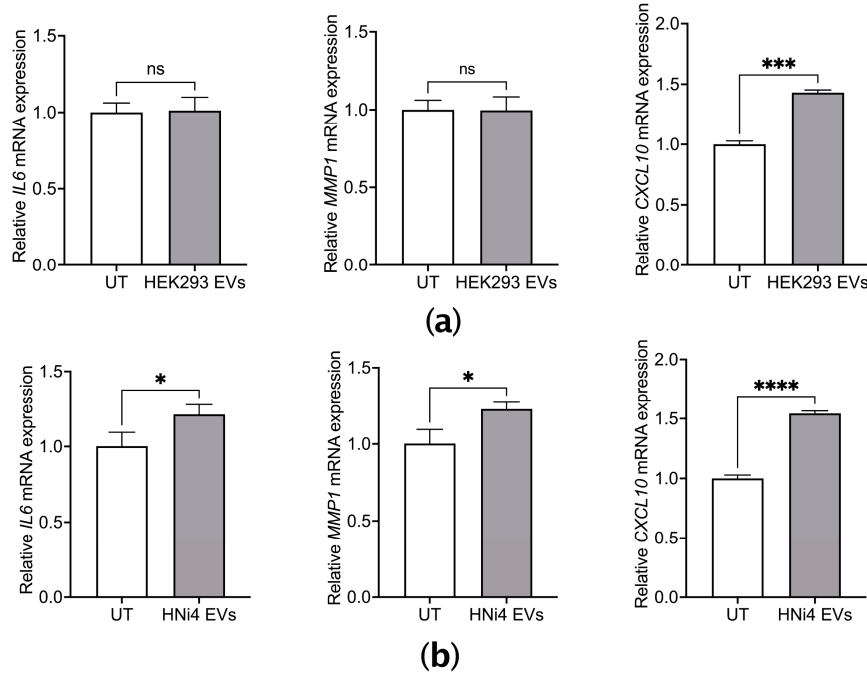

**Figure S4.** EVs from Ni-transformed cells induced mRNA expression of inflammatory markers in HEK293 cells. mRNA expression of inflammatory markers including IL6, MMP1 and CXCL10 were measured by quantitative real-time PCR after HEK293 cells were treated with 10  $\mu$ g/mL of EVs from HEK293 **(a)** or HNi-4 **(b)**. Values are presented as mean  $\pm$  SEM. \* $p$  < 0.05, \*\*\* $p$  < 0.001, \*\*\*\* $p$  < 0.0001.



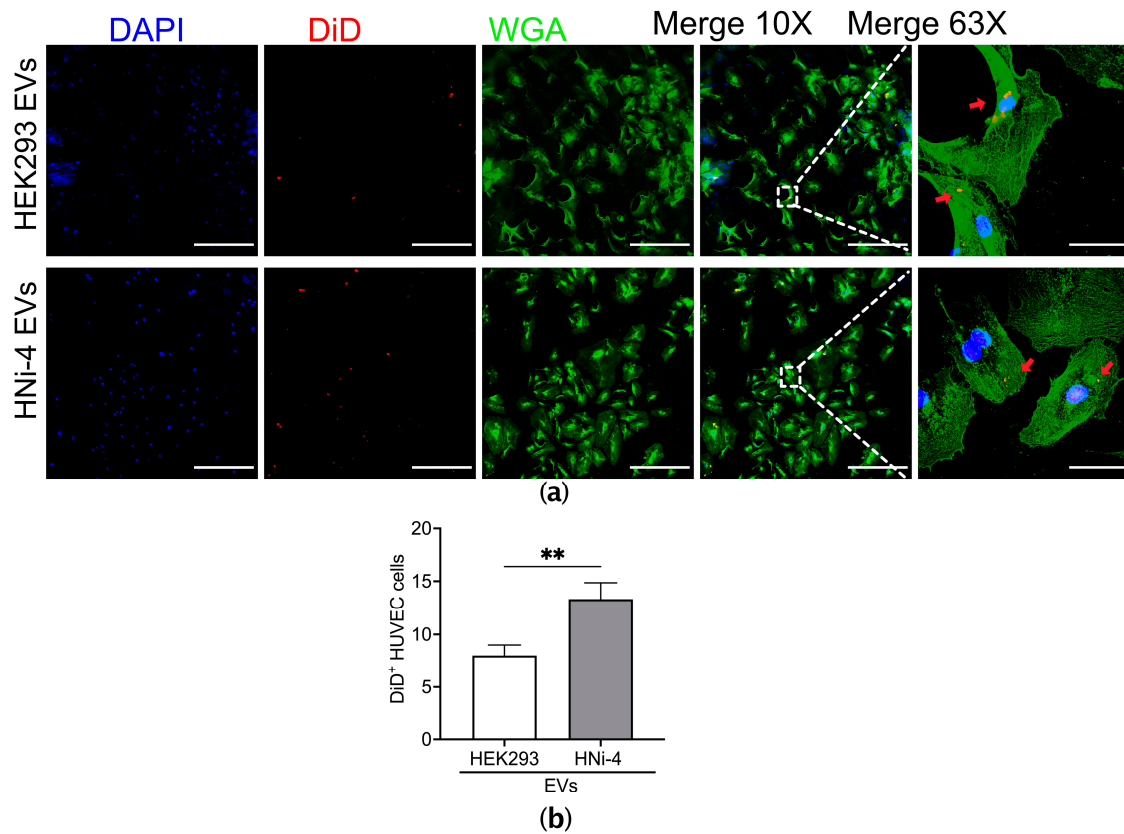

**Figure S5.** Ni exposure affected incorporation of HEK293 derived EVs in HUVEC cells. (a) EVs from HEK293 and HNi-4 were isolated, labelled with DiD dye, and added to HUVEC cells for 5 h before being scanned in confocal microscope (scale bar: 400  $\mu$ m (10X) and 60  $\mu$ m (63X), Zeiss 880). Blue-DAPI, red-DiD, green-WGA, red arrow-incorporated EVs. (b) Quantification and comparisons of the number of incorporated EVs in HUVEC cells. Values are presented as mean  $\pm$  SEM. \*\* $p < 0.01$ .

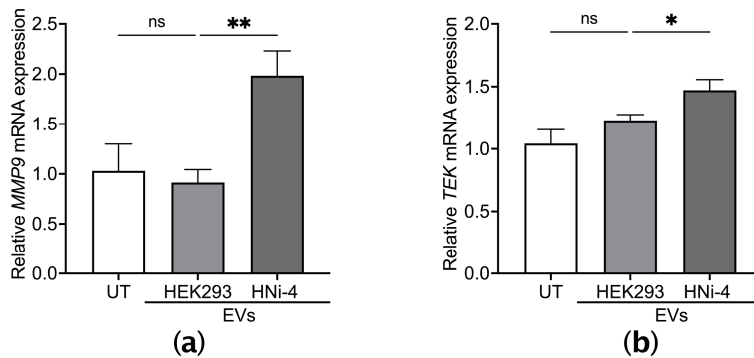

**Figure S6.** EVs from Ni-exposed HEK293 cells altered inflammation marker and coagulation marker in HUVEC cells. HUVEC cells were treated with 10  $\mu$ g/mL of EVs from HEK293 or HNi-4 cells. mRNA expression of coagulation markers including (a) MMP9 and (b) TEK were measured by quantitative real-time PCR. Values are presented as mean  $\pm$  SEM. \* $p < 0.05$ , \*\* $p < 0.01$ .
